# Supplementary material for: Synthesis and self-assembly of a novel fluorinated triphilic block copolymer
Source: Royal Society of Chemistry journal article supplement (doi:10.1039/c4py00308j), 2014-01-01
Supplement: c4py00308j1.pdf [file c4py00308j1.pdf]

## Electronic supplementary information

# Synthesis and Self-Assembly of a Novel Fluorinated Triphilic Block Copolymer

Xinxin Li<sup>\*a</sup>, Yanhua Yang<sup>a</sup>, Guojun Li<sup>a</sup> and Shaoliang Lin<sup>\*ab</sup>

*<sup>a</sup>Key Laboratory of Specially Functional Polymeric Materials and Related Technology of the Ministry of Education, School of Materials Science and Engineering, East China University of Science and Technology, Shanghai 200237, China, Email: xinxinli@ecust.edu.cn*

*<sup>b</sup>Shanghai Key Laboratory of Advanced Polymeric Materials, School of Materials Science and Engineering, East China University of Science and Technology, Shanghai 200237, China, Email: slin@ecust.edu.cn*

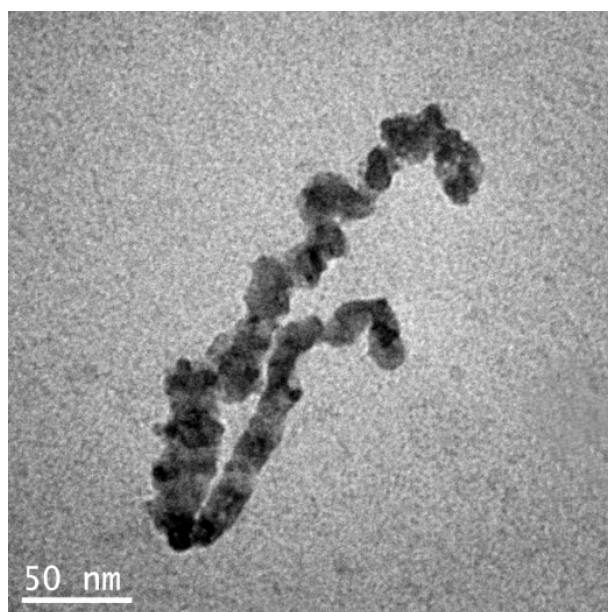

**Fig. S1** Worm-like aggregate self-assembled from P(MMA-*co*-MAA)-*b*-PFEMA solutions in water content of 20%.

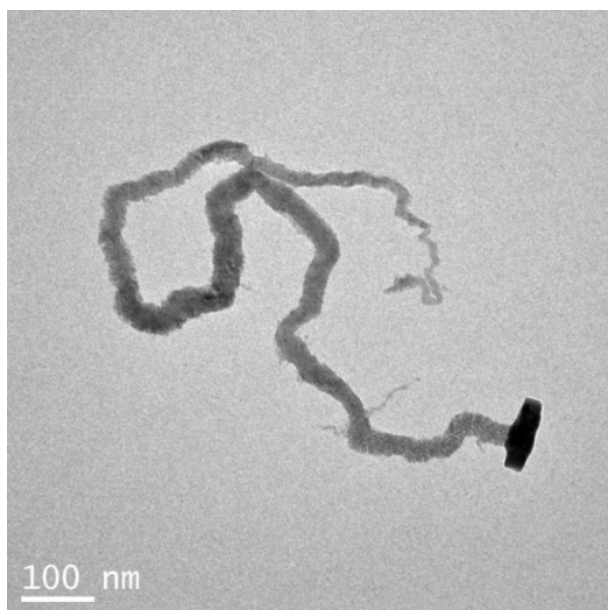

**Fig. S2** Nail-shaped micelle self-assembled from P(MMA-*co*-MAA)-*b*-PFEMA solutions in water content of 80%.
